# DNA sliding and loop formation by *E. coli* SMC complex: MukBEF

Man Zhou <sup>1†</sup>

<sup>1</sup>Department of Biochemistry, University of Oxford, Oxford OX1 3QU, UK

†Corresponding author. Email: [man.zhou@bioch.ox.ac.uk](mailto:man.zhou@bioch.ox.ac.uk)

## Abstract:

SMC (structural maintenance of chromosomes) complexes share conserved architectures and function in chromosome maintenance via an unknown mechanism. Here we have used single-molecule techniques to study MukBEF, the SMC complex in *Escherichia coli*. Real-time movies show MukB alone can compact DNA and ATP inhibits DNA compaction by MukB. We observed that DNA unidirectionally slides through MukB, potentially by a ratchet mechanism, and the sliding speed depends on the elastic energy stored in the DNA. MukE, MukF and ATP binding stabilize MukB and DNA interaction, and ATP hydrolysis regulates the loading/unloading of MukBEF from DNA. Our data suggests a new model for how MukBEF organizes the bacterial chromosome *in vivo*; and this model will be relevant for other SMC proteins.

## Introduction

The SMC (structural maintenance of chromosome) complexes share conserved architectures and function in chromosome maintenance throughout all kingdoms of life, including condensin, cohesin, and SMC5/6 in eukaryotes and MukBEF in *E. coli* (1) (2) (3). SMC dimers adopt a large ring structure containing a ~50-nm antiparallel coiled-coil “arm” with a hinge dimerization domain and an ABC-type ATPase head domain (4). The distinctive and conserved molecular architecture suggests a common principle of SMC complex function. One mechanism explaining the formation of DNA loops is provided by the loop extrusion model, which proposes SMC proteins to act as loop-generating motors during iterative cycles of ATP hydrolysis. Single molecule assays have demonstrated that condensin and cohesin translocate along DNA in an ATP-dependent manner (5) (6); in contrast, other studies have reported that cohesin slides along DNA in an ATP-independent manner (7) (8). Meanwhile, there are reports of real-time visualization of symmetric/asymmetric DNA loop extrusion by condensin and symmetric loop extrusion by cohesin (9) (10) (11) (12).

37 However, all proposed models ignore the physical nature of DNA as a highly dynamic polymer  
38 with properties that may profoundly affect the function of SMC proteins. Overlap of two DNA  
39 polymers in cylindrical confinement significantly reduces their conformational entropy, and  
40 theoretical simulations suggest that entropic forces can drive chromosome segregation under  
41 the right physical condition. (13–17) Moreover, experimental studies have already well  
42 characterized the *E. coli* nucleoid dynamics in living cells (18) (19). Another simulation-based  
43 model suggested that chromatin loops can be efficiently formed by non-equilibrium dynamics  
44 of DNA on the diffusive sliding of molecular slip links (20).

45 Here, we exploit two complementary single-molecule assays with total internal reflection  
46 fluorescence (TIRF) microscopy to probe the function of the *E. coli* SMC complex, MukBEF, by  
47 either immobilizing DNA or MukB on the surface (Fig.1B).

## 48 Results

49

### 50 DNA compaction by MukB at low salt in the absence of ATP

51 Condensin and cohesin can compact DNA in the presence of ATP (9–11) (21). However, in  
52 assay 1 (Fig. 1B), no DNA compaction can be observed on the doubly tethered  $\lambda$ DNA while  
53 incubation with MukBEF and ATP-Mg<sup>2+</sup> (Video S1). Fluorescently labelled MukB (MukB-Cy5)  
54 shows there is no MukBEF stable association with DNA during the observation time (Video  
55 S2). Importantly, fluorescent labelling does not affect MukBEF ATP hydrolysis activity (Fig.S2).

56 To examine the function of MukBEF carefully, we tested the MukBEF components  
57 sequentially. First, we incubated 10 nM MukB alone with DNA in the absence of flow, all slack  
58  $\lambda$ DNA molecules became tight (**compaction**) (Fig. 1C, video S3), and DNA ‘bulbs’ (**locally  
59 compacted DNA**) can be observed frequently (98.7%, 149/151 of DNAs, and Fig. 1H). DNA  
60 compaction is gradual over time (Fig. 1C and 1D) and the compaction rate is MukB  
61 concentration dependent, with higher compaction rate at higher concentration of MukB. For  
62 example, 10 nM MukB takes ~1000 s to fully compact DNA, while 100 nM MukB takes ~150  
63 s (video S3 & video S4). We noticed that there is a ‘threshold’ protein concentration and salt  
64 sensitivity required for DNA compaction. For example, at 50 mM NaCl, 1 nM MukB alone  
65 cannot compact DNA, and ‘bulbs’ are rarely observed even after 4 hours (1.7 %, 1/60 DNAs),  
66 while for concentrations larger than 10 nM, MukB can easily compact DNA and ‘bulbs’ are  
67 frequently observed (98.7%, 149/151 of DNAs). At 150 mM NaCl, even 100 nM MukB cannot  
68 compact DNA and ‘bulbs’ are rarely observed (0 %, 0/58 DNAs, Fig. 1H). This compaction is  
69 not stable and can be easily destroyed by resuming high flow rates (> 0.5 pN), and that DNA  
70 ‘bulbs’ cannot be expanded into loops at ~1 pN of applied force.

71 To test whether MukB has a sequence preference for prominent loading sites to form ‘bulbs’,  
72 we over-stretched the DNA (similar as DNA curtain) and added MukB-Cy5; a fairly  
73 homogenous distribution of MukB along the DNA can be observed (Fig. 1E & video S5),  
74 consistent with MukB loading randomly onto DNA. The bleaching curve of MukB-Cy5 indicates  
75 multiple MukB molecules binding to DNA (Fig. 1F).

76

77 **ATP inhibits MukB-mediated DNA compaction in the absence of MukEF**

78 We further tested the function of ATP during DNA compaction by MukB. Strikingly, DNA  
79 cannot be compacted by MukB incubation with ATP-Mg<sup>2+</sup> and no ‘bulbs’ can be seen on DNA  
80 (the fraction of DNA bulbs: 1.0 %, (1/ 98 of DNAs) Fig. 1G & Fig. 1H). Meanwhile, the dwell  
81 time of MukB on DNA in the presence of ATP-Mg<sup>2+</sup> is very short and stable association of MukB  
82 with DNA cannot be observed (Video S6).

83 Constructs with EQ mutation in the SMC ATPase domain, where the two catalytic domains  
84 remain in an ATP engaged condition, are deficient in ATP hydrolysis and exhibit abnormally  
85 stable binding to DNA (22) (23) (24). *In vivo* studies suggest that an EQ mutation holds  
86 together newly replicated chromosomes and inhibits chromosomes segregation (25), or  
87 inhibits the relocation of SMC proteins (MukBEF and cohesin) (26) (27). We further studied  
88 the EQ MukB mutant (MukB<sup>EQ</sup>), which can bind but cannot hydrolyse ATP. Strikingly, MukB<sup>EQ</sup>  
89 can fully compact DNA both in the presence and absence of ATP-Mg<sup>2+</sup> at a MukB  
90 concentration above 10 nM (fraction of DNA bulbs: 90.2 %, (46/51 of DNAs) and 88.0%,  
91 (103/117 of DNAs) Fig. 1G, Fig. 1H and video S7 & 8). Another DA mutation (MukB<sup>DA</sup>) which  
92 cannot bind ATP, can also fully compact DNA both in the presence and absence of ATP-Mg<sup>2+</sup>  
93 at a higher MukB concentration (100 nM) (fraction of DNA bulbs: 96.3 %, (52/54 of DNAs) and  
94 98.1%, (51/52 of DNAs) Fig. 1G, Fig. 1H and video S9 & 10). The EQ and DA mutation data  
95 suggest that ATP does not contribute directly to DNA compaction.

96 **MukEF and ATP-Mg<sup>2+</sup> conditionally stabilize pre-incubated MukB and DNA complex**

97 MukEF depleted strains show the same temperature-sensitive growth phenotype as the  
98 MukB-null strain, and MukEF is essential for stable association of MukB with chromosome *in*  
99 *vivo* (28). Thus, we further investigated the function of MukEF and ATP-Mg<sup>2+</sup>, for which we  
100 first incubated MukB with DNA until DNA is fully compacted, then flowed in MukEF with ATP-  
101 Mg<sup>2+</sup>. We observed that DNA just becomes slack, and stable ‘bulbs’ can be observed (Fig. 2A)  
102 under high flow. Occasionally, these ‘bulbs’ can be expanded into ‘loops’, however, these  
103 loops do not grow in size over time. (Fig.2B & video S12). Most MukB was just washed off,  
104 with some clusters remaining on DNA, and quantification shows that the numbers of MukB  
105 varies. 84.1% (Fig. 2D) measured MukB shows the number between 2 to 4, which indicates  
106 that the major population of MukBEF clusters are dimers of homodimeric MukB. These ‘bulbs’  
107 are very stable and remain associated with DNA even under ~2.5 pN of applied force.

108 **Stable loop formation by MukB<sup>EQEF</sup> and ATP-Mg<sup>2+</sup>**

109 Because MukB<sup>EQEF</sup> can form clusters *in vivo* (26), we wanted to test the behaviour of  
110 MukB<sup>EQEF</sup> *in vitro*. Here, we observed that MukB<sup>EQEF</sup> forms clusters on the DNA with MukB<sup>EQ</sup>  
111 EF and ATP-Mg<sup>2+</sup>, and these MukB<sup>EQEF</sup> complexes are very stably associated on DNA with 150  
112 mM NaCl buffer and at ~1 pN of applied force (Fig. 2E, Fig. S5A & video S13). DNA ‘bulbs’ can  
113 also be observed, and frequently these ‘bulbs’ can be expanded into ‘loops’ at ~1 pN of  
114 applied force, however, the loops don’t grow in size over time even when applying ~1 pN  
115 force (Fig. 2E & video S14). Quantification shows that the number of MukB<sup>EQEF</sup> varies (Fig. 2J),  
116 and higher-number clusters appear more frequently compared to the wt-MukBEF with ATP-  
117 Mg<sup>2+</sup> (Fig. 2D and Fig. 2J). When we decreased MukB<sup>EQ</sup> to 1 nM, stable association of MukB<sup>EQ</sup>

118 with DNA was also observed, however, without DNA ‘bulbs’ (Fig. 2F). We speculate that these  
119 DNA ‘bulbs’ and ‘loops’ are formed by dimerization of MukF, because they are very stable  
120 against high flow rates, in contrast to DNA ‘bulbs’ formed by MukB alone and which are not  
121 stable under high flow rates. To test this, we flowed in MukB<sup>EQ</sup> with truncated MukF  
122 (Monomeric MukF, MonoMukF) which is monomeric in solution, being unable to form stable  
123 heads-engaged dimers (29). Very stable protein complexes can be observed on DNA with  
124 MonoMukF with 150 mM NaCl buffer and at ~1 pN of applied force (Fig. S5B and video S15);  
125 however, DNA ‘bulbs’ or ‘loops’ were rarely observed. Quantification shows that 88.4 % of  
126 cluster population contains less than 2 MukB<sup>EQ</sup>, indicates MukB<sup>EQ</sup> is a single dimer with  
127 MonoMukF. (Fig. S4 & Fig. 2K).

## 128 **DNA can be stretched on immobilized MukB and slides through MukB**

129 To further investigate the dynamics of DNA under action of MukBEF, in assay 2, MukB was  
130 immobilized on the surface, and the interaction of DNA with MukB(EF) was analysed (Fig. 1B).  
131 First, we pre-incubated circular DNA (44kb plasmid) with surface-immobilised MukB-His, as  
132 well as MukE-Flag, MukF-Flag and ATP-Mg<sup>2+</sup> in solution; in this case, essentially no DNA spots  
133 were observed on the surface (Fig. 3A and video S16). However, upon incubation of MukB-  
134 His with plasmid DNA, many DNA spots can be observed on the surface (Fig. 3A & video S17).  
135 For the control, we barely observed any DNA spots on the biotinylated anti-His<sub>6</sub>-antibody  
136 functionalized PEG surface in the absence of MukB-His, which indicates that the imaged DNA  
137 molecules are specifically captured by MukB. Under flow, we observed stretched plasmids on  
138 the surface and breaking of DNA, with laser excitation commonly triggering DNA sliding off  
139 the surface (Fig. 3B & video S18).

140 To test what happens to linear DNA, we first incubated MukB with  $\lambda$ DNA at 50 mM NaCl, then  
141 flowed the mixture into the cell functionalized with biotinylated anti-His<sub>6</sub>-antibody on the  
142 surface. Strikingly,  $\lambda$ DNA can be easily stretched on the surface with many tether points and  
143 two DNA ends spinning round the tether points (Fig. 3C). At low concentration of MukB,  $\lambda$ DNA  
144 was stretched only with two tether points, and laser-induced breaking of DNA commonly  
145 triggers DNA sliding off the tether points (Fig. 3C, Fig. 3D & video S19). Stretching DNA  
146 normally requires modification of DNA extremities to anchor DNA to a functionalized  
147 substrate, e.g., via sticky ends or biotin functionalization, and the bond strength between  
148 biotin and streptavidin is far beyond the weak electrostatic interaction between MukB and  
149 DNA (Fig. S3). Why could naked  $\lambda$ DNA be stretched on the surface? One possibility is that the  
150 DNA is topologically entrapped in the MukB ring (Fig. 3E), which inhibits DNA detachment  
151 from the surface even under strong flow.

152 For open  $\lambda$ DNA, it is very difficult to estimate the DNA length and thus to calculate the sliding  
153 speed, as many DNA fragments are floating out of the TIRF region. We managed to get two  
154 circular  $\lambda$ DNA. After DNA breakage,  $\lambda$ DNA slides on immobilized MukB and sequentially  
155 detaches (Fig. 3F & video S20). We further calculated the sliding speed for  $\lambda$ DNA, which was  
156 ~2kbp/s (Fig. 3G). For plasmids, the sliding speed was ~5kbp/s, faster than for linear  $\lambda$ DNA  
157 (Fig. 3G).

158

## 159 **MukE, MukF and ATP binding stabilizes MukB and DNA complex on the surface**

160 To further investigate the function of MukEF and ATP-Mg<sup>2+</sup>, we then flowed in MukE-Flag,  
161 MukF-Flag and ATP-Mg<sup>2+</sup> in 150 mM NaCl buffer to investigate the behaviour of λDNA on  
162 tethered MukB; after these additions, most λDNA molecules were just washed off (Fig. 3H &  
163 video S21). When we flowed in MukE-Flag, MukF-Flag and ATP-Ca<sup>2+</sup>, which is supposed to  
164 inhibit ATP hydrolysis of the nucleotide-binding domains (30), strikingly, most λDNA remained  
165 on the surface. We then significantly increased the flow rate up to 100ul/min (~ 2.5 pN) with  
166 MukE-Flag, MukF-Flag and ATP-Ca<sup>2+</sup> in 150 mM NaCl, and all λDNA were over-stretched on  
167 the surface to linear conformations with a few tether points (Fig. 3I & video S22). We then  
168 increased the laser power to break DNA into pieces (Fig. 3I & video S22). Strikingly, λDNA does  
169 not slide off the surface, and the tether points remained on the surface. This suggests that  
170 without ATP hydrolysis, MukE, MukF and ATP stabilize the interaction between MukB and  
171 DNA, and this stabilized interaction can even resist high force (~ 2.5 pN).

172

173

## 174 **Discussion and conclusions**

175 Our results show that MukB alone can compact DNA under low salt conditions when MukB  
176 concentration is above a certain ‘threshold’ concentration. This is in agreement with previous  
177 studies that showed MukB alone can compact DNA (31) (32). This ‘threshold’ concentration  
178 is easily explained by conventional DNA-protein interaction kinetics as shown in Fig.4 A. It  
179 should be noted that this *in vitro* observation cannot be tested *in vivo*, as ATP is always  
180 present in a cell.

181 As MukB dimers alone have negligible ATPase activity (33–35), the catalytic cycle of ATP  
182 hydrolysis may influence the dwell time of MukB on DNA by regulating the loading/unloading  
183 of MukB on and from DNA, when MukE and MukF are absent, and this could be the underlying  
184 reason why ATP inhibits MukB-mediated DNA compaction. MukB, ATP-Mg<sup>2+</sup>, without MukEF  
185 shows no DNA compaction *in vitro* which is in agreement with *in vivo* observation that MukEF  
186 is essential for stable association of MukB with DNA, and no MukB stable clusters were  
187 detected in cells deficient in MukE or MukF (36), (28).

188 In this study, we showed that MukB<sup>EQ</sup> and MukB<sup>DA</sup> does also compact DNA under low salt  
189 conditions. Our results show that MukB<sup>EQ</sup> with MukE, MukF and ATP-Mg<sup>2+</sup> can form stable  
190 complexes on DNA. These complexes are extremely stable even at 150 mM NaCl and high  
191 flow rates. DNA ‘bulbs’ and ‘loops’ can be observed, and these loops are more likely formed  
192 by dimerization of MukF, as loops were not observed with MonoMukF. Loading and  
193 unloading of MukB<sup>EQEF</sup> on/from DNA can easily be elucidated by the binding kinetics of  
194 MukB<sup>EQEF</sup> and ATP (Fig. 4D).

195 There exists one core argument that MukBEF together with ATP-Mg<sup>2+</sup> all are required for  
196 normal chromosome organization and segregation *in vivo*; while our *in vitro* single-molecule  
197 data shows that MukBEF together with ATP-Mg<sup>2+</sup> seems to be incapable of remodelling DNA;  
198 only rare MukBEF clusters on DNA ‘bulbs’ were observed occasionally. Actually, this is in



199 agreement with *in vivo* observations that even high concentrations of  $\sim 100$  nM of  
200 (Muk4B:4E:2F)-complexes at high density of DNA in *E.coli* (the density of DNA in *E.coli* is  $10^5$   
201 times of DNA used in the single-molecule assay) result only in 48% loading on DNA with a  
202 dwell time of about  $\sim 60$  s. The unloading rate ( $k_{off\_MukBEF}$ ) is  $\sim 0.015$  s $^{-1}$  (dwell time 65 s), and  
203 the loading rate *in vivo* ( $k_{on\_MukBEF}$ ) is only  $\sim 3.9 \times 10^{-6}$  s $^{-1}$  which would result in 48% occupancy  
204 of MukBEF on chromosome (26) (37). In the single-molecule assay, it requires  $1/3.9 \times 10^{-6} =$   
205  $2.56 \times 10^5$  s ( $\sim 3$  days) to capture a loading event in pre-incubated MukBEF solution, and that  
206 is also the reason why in an *in vitro* biochemistry assay which shows a 'fake' inhibition of  
207 MukEF to loading of MukB on DNA. The extremely low loading rate does also reveal that most  
208 collisions of MukBEF with DNA do not lead to loading, and there is a small chance that ATP  
209 binding or hydrolysis can trigger distinct conformational changes within the two head regions  
210 of MukBEF that could act synergistically to open the MukB ring for DNA loading/unloading.  
211 ATP hydrolysis is required to regulate MukB head opening/closing, and therefore regulates  
212 MukBEF loading/unloading on/from DNA to balance the numbers of MukBEF on DNA, as too  
213 many loops generated by MukBEF lead to over-compacted chromatin which may block  
214 chromosome replication, gene expression and regulation, whereas too few generated loops  
215 lead over-spread chromatin.

216 Pre-incubated MukBEF complexes rarely undergo stable association with DNA, while  
217 sequential incubation of MukB with DNA, and then MukEF and ATP-Mg $^{2+}$ , can stabilize  
218 MukB/DNA interaction. Together with *in vivo* observations that MukEF is essential for stable  
219 association of MukB, these superficially conflicting observations may be reconciled by  
220 assuming that DNA binds MukB topologically (proposed model in Fig. S8).

221 Hydrolysis of ATP does only yield about 20 to 25  $k_B T$  energy. Actually, it was shown that 80%  
222 of the input energy of ATP was dissipated into heat and did not contribute to power the motor  
223 protein kinesin (38). The free energy released upon ATP hydrolysis is rapidly dissipated and it  
224 is the differential binding of ATP and its hydrolysis products ADP and Pi that leads to the slow  
225 conformational transitions of the motor protein (39). Numerous data has already shown that  
226 ATP hydrolysis is not involved in directional motion; rather, it drives SMC protein loading and  
227 unloading onto chromatin (40, 41). A relatively small force (entropic force) of  $k_B T/P$   
228 is required to align elastic units of dsDNA, and this entropic force is  $\sim 0.1$  pN, within the range  
229 of external forces that were applied in this work, and also published for single-molecule  
230 experiments that observed DNA compaction or looping induced by cohesion and condensin  
231 (9)(11) (21)(42). Moreover, in cells, DNA can move or slide by itself if considering the elastic  
232 energy that DNA contains, such as supercoiling (Fig. 3G) (43)(44)(45)(46).

233 Our DNA sliding model (Fig. 4F) does explain how MukBEF can efficiently organize DNA while  
234 having only low ATPase activity and the intrinsic ability to entrap DNA topologically and react  
235 as a ratchet. Nucleosomes containing  $\sim 150$  base pairs of tightly wrapped DNA are the basic  
236 structural elements of chromatin compaction and regulation, while SMC proteins contribute  
237 to the large-scale chromosome organization and regulation. Nucleosomes do show sliding  
238 and loop formation. (47) (48) (49) (50)(51). Perhaps, SMC proteins and nucleosomes share a  
239 common DNA sliding, loop formation, and ratchet mechanism. Other SMC proteins can also  
240 be immobilized on the surface to test this DNA sliding and ratchet mechanism. How SMC

241 complexes facilitate DNA chromosome organization and segregation touches fundamental  
 242 biological and physical questions: What are the molecular mechanisms of motor proteins?  
 243 What is the contribution of entropy in the living cells? Although we cannot rule out complete  
 244 answers for these questions, our results suggest a possible molecular mechanism of SMC  
 245 protein, which could rationalize all the single-molecule observations in this study.  
 246

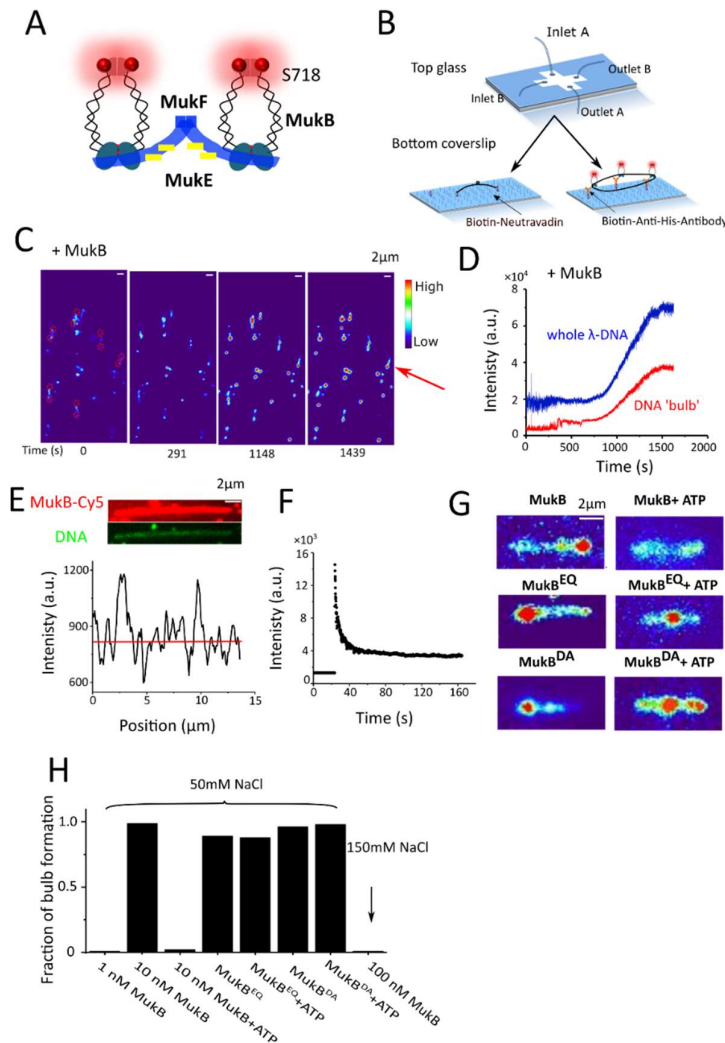

247

248 **Fig.1. DNA compaction by MukB in the absence of ATP.** (A) Cartoon representation of MukBEF  
 249 subunits and domains in different colors. MukF (blue) is kleisin protein which binds and bridges the  
 250 ATPase head domains of the MukB dimers, and MukE (yellow) is KITE protein in *E. coli*. S718 at hinge  
 251 domain was mutated to unnatural amino acid (*p*-azido-*l*-phenylalanine, AZF) and labelled with Cy5  
 252 (marked as red balls) via click chemistry. (B) Sketch of single molecule study. Top slide is designed for  
 253 injection along two perpendicular directions. The bottom slide is to immobilize either MukB or DNA  
 254 on the surface. In assay 1, 48.5 kbp  $\lambda$ DNA was doubly tethered to the PEG modified surface. In assay  
 255 2, MukB was immobilized by using a His<sub>6</sub>-tagged variant of MukB and biotinylated anti-His<sub>6</sub>-antibody  
 256 on the PEG surface. (C) Time course showing DNA compaction by 10 nM MukB at 50 mM NaCl. DNA  
 257 'bulbs' are visible as bright dots on the doubly tethered  $\lambda$ DNA. Two tethered ends are marked by red  
 258 dashed circles. The red arrow shows one example of a doubly tethered  $\lambda$ DNA (D) The fluorescence

259 intensity growing over time for whole  $\lambda$ DNA (blue curve) and for DNA 'bulb' (red curve) as indicated  
260 by red arrow in Fig. 1C. The distance between two tethered ends is  $\sim 4 \mu\text{m}$ . We noticed that it was hard  
261 to quantify the compaction rate, as in TIRF microscope, the laser intensity decays exponentially with  
262 increasing distance from the interface; therefore, the intensity of entire  $\lambda$ DNA is low at the beginning  
263 as most  $\lambda$ DNA fragments are floating out of TIRF field. As time goes, more DNA is compacted coming  
264 close to the surface, and the increased intensity of 'DNA bulb' (Fig. 1D) comes from two fractions: one  
265 from compacted DNA, and the other from the increased laser intensity close to the surface. (E)  
266 Distribution of Cy5 labelled MukB on over-stretched DNA (DNA curtain; video S5). The top panel shows  
267 two spectral channels: the red one is a snapshot of Cy5 labelled MukB, and the green one is a snapshot  
268 of Sytox orange stained DNA. The bottom panel is the fluorescence distribution of Cy5 along the DNA.  
269 (F) Bleaching curve of Cy5 in Fig. 1E over time, which indicates that many MukB molecules binding to  
270 DNA. (G) Snapshot examples of  $\lambda$ DNA under different conditions. DNA compaction and DNA 'bulb'  
271 formation is induced by MukB only without ATP. However, 'bulbs' can be seen after addition of  
272 MukB<sup>EQ</sup> and MukB<sup>DA</sup>, both in the absence and presence of ATP. Scale bar  $2 \mu\text{m}$ . (H) Fraction of DNA  
273 bulbs that formed on doubly tethered  $\lambda$ DNA following incubation with the indicated components at  
274 different salt conditions. 50-150 DNAs were analysed.

275

276

277

278

279

280

281

282



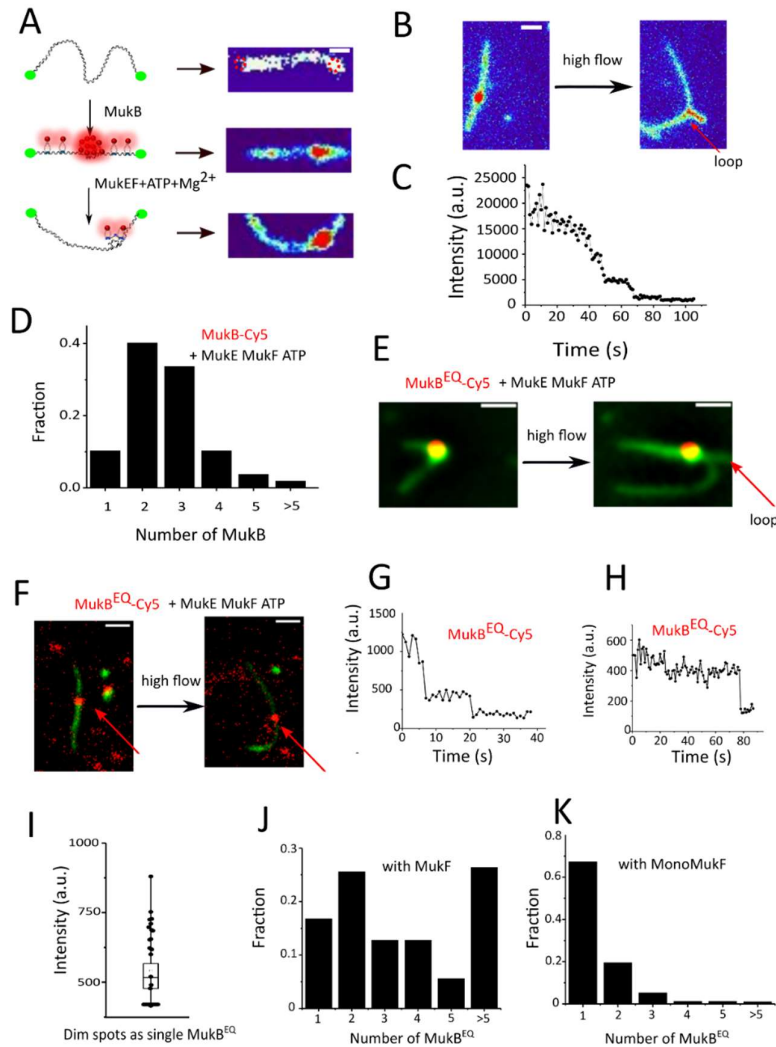

283

284 **Fig. 2. DNA compaction and loop formation under different conditions.** (A) DNA 'bulbs' on the u-  
 285 shaped double-tethered  $\lambda$ DNA by MukBEF clusters with ATP-Mg<sup>2+</sup>. First,  $\lambda$ DNA was incubated with  
 286 MukB until DNA is fully compacted, and afterwards, MukEF and ATP-Mg<sup>2+</sup> were flowed into the  
 287 chamber from a perpendicular direction. Scale bar 2  $\mu$ m. The right panels show exemplary snapshots  
 288 of different DNA conformations. (B) One example of a 'bulb' formed in the presence of MukBEF  
 289 clusters with ATP-Mg<sup>2+</sup>. This 'bulb' can be expanded into loops at  $\sim$ 1 pN of applied force. The loop  
 290 does not grow over time (Video S12). Scale bar 2  $\mu$ m. (C) Representative time traces of fluorescence  
 291 intensities of MukBEF clusters with ATP-Mg<sup>2+</sup> on tethered DNA. (D) The chart shows numbers of MukB  
 292 clusters with ATP-Mg<sup>2+</sup> on DNA 'bulbs' based on measuring the fluorescence intensity of the 'bulbs'  
 293 and comparing it to that of a single MukB bound to glass (bleaching steps are too noisy for reliable  
 294 quantification). Quantification shows 40.2% of 2-MukB, 33.6% of 3-MukB, and 10.3% of 4-MukB  
 295 molecules; 107 DNAs were analysed. (E) Stable 'bulbs' and 'loops' can be easily observed when  
 296 MukB<sup>EQ</sup>, MukEF and ATP-Mg<sup>2+</sup> are present. One example of a 'bulb' that can be expanded into a loop  
 297 (red arrow) at  $\sim$ 1 pN of applied force (Video S14). Scale bar 2  $\mu$ m. (F) Stable association of MukB<sup>EQ</sup> can  
 298 be easily observed on DNA at a decreased concentration of MukB<sup>EQ</sup> (1 nM), MukE<sub>2</sub>F (2 nM) in the  
 299 presence of 1 mM ATP-Mg<sup>2+</sup>. However, no 'bulbs' or 'loops' can be observed under flow. Labelled

300 MukB<sup>EQ</sup> (marked by red arrow) moves together with DNA, confirming that it was indeed stably bound  
 301 to DNA. Scale bar 2  $\mu$ m. (G) Representative two stepwise bleaching events of MukB<sup>EQ</sup> in the presence  
 302 of MukEF and ATP-Mg<sup>2+</sup>. (H) Representative single step bleaching of MukB<sup>EQ</sup> in the presence of MukEF  
 303 and ATP-Mg<sup>2+</sup>. (I) Intensity distribution of single MukB<sup>EQ</sup> EF clusters on the surface. (J) The chart shows  
 304 numbers of MukB<sup>EQ</sup> on DNA 'bulbs' in the presence of MukEF and ATP-Mg<sup>2+</sup>, based on measuring the  
 305 fluorescence intensity of the 'bulbs' and comparing it to that of single MukB<sup>EQ</sup> bound to glass. 125  
 306 clusters were analysed. (K) The chart shows numbers of MukB<sup>EQ</sup> on DNA 'bulbs' in the presence of  
 307 MukE, MonoMukF, and ATP-Mg<sup>2+</sup>. 164 clusters were analysed.

308

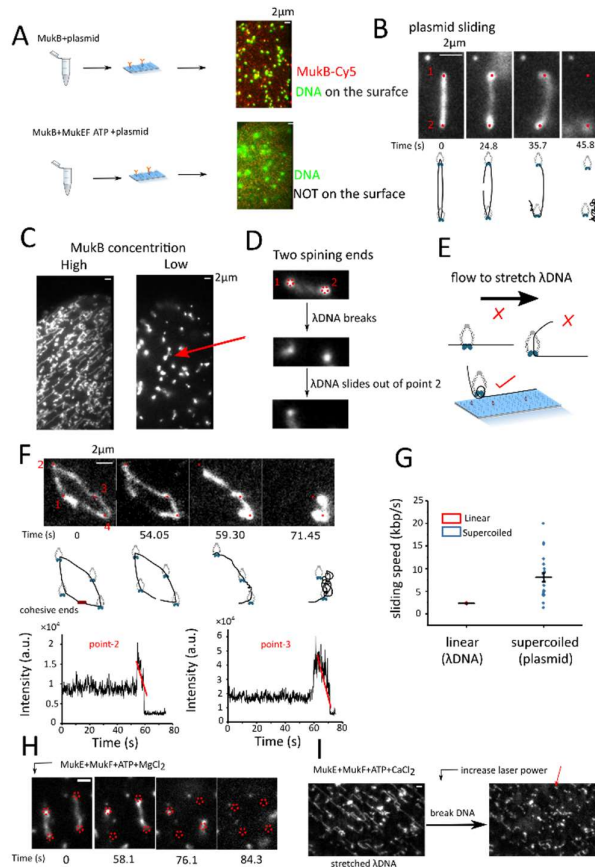

309

310 **Fig. 3 Immobilization of His<sub>6</sub>-tagged MukB on the surface.** (A) Upper panel: example of circular DNA  
 311 (44 kb plasmid, green, Sytox orange staining) captured on the surface and incubated with His<sub>6</sub>-tagged  
 312 MukB. Lower panel: example of circular DNA diffusion in solution incubated with 10 nM MukB with  
 313 2mM ATP+ 2 mM CaCl<sub>2</sub>, +10 nM MukE + 20 nM MukF (B) Sequential images of 44 kb plasmid sliding  
 314 through MukB. Two red dots indicate the tether points. At ~24.8 s, the plasmid DNA breaks. At ~35.7  
 315 s and ~45.8 s, the plasmid DNA slides through the tether points one after the other. (Video S18) (C)  
 316 Linear DNA ( $\lambda$ DNA) can be stretched on surface with immobilized MukB. Left panel: 150 pM  $\lambda$ DNA with  
 317 20 nM MukB, right panel: 150 pM  $\lambda$ DNA with 5 nM MukB. Incubation buffer: 10 mM NaCl 20 mM Tris-  
 318 HCl pH=7.0. (D) One example with two DNA ends spinning round the tether points (Video S19).  
 319 Red dashed circles indicate two captured points on the surface with immobilized MukB. DNA breaks  
 320 and slides out of point-2. (E)  $\lambda$ DNA topologically entrapped in the MukB ring can be stretched along  
 321 the surface. (F)  $\lambda$ DNA slides through immobilized MukB and is sequentially released. Sequential  
 322 images of  $\lambda$ DNA sliding across MukB. Series of snapshots showing Sytox orange-stained  $\lambda$ DNA sliding

323 through tethered MukBs one by one (Video S20). Four red dots indicate the tether points. At  $\sim 54$  s,  
 324 the cohesive end breaks. At  $\sim 59.3$  s and  $\sim 71.45$  s, the  $\lambda$ DNA slides through the second and the third  
 325 tether points, respectively. The DNA slides in a clockwise direction. Notably, the  $\lambda$ DNA does not slide  
 326 through the fourth tether point in anti-clockwise direction. Schematic diagrams under each snapshot  
 327 are for visual guidance. Two plots monitor the DNA intensity around the tether points (point 2 and  
 328 point 3) over time. The linear decay (red lines) indicates that the DNA release mechanism is by sliding,  
 329 instead of multiple binding/unbinding. (G) Quantification of sliding speed of linear DNA ( $\lambda$ DNA) and  
 330 supercoiled DNA (44 kb plasmid). (H) Time course of captured  $\lambda$ DNA on surface with immobilized  
 331 MukB under high salt wash (150 mM) with MukE, MukF and ATP-Mg<sup>2+</sup>. The capture points are marked  
 332 by red dashed circles. One capture point was released from surface at 58.1 s, and two other points  
 333 were released at 76.1 s, and the last capture point was released at 84.5 s. (video S21) (I) Captured  
 334  $\lambda$ DNA on surface with immobilized MukB under high salt wash (150 mM) with MukE, MukF and ATP-  
 335 CaCl<sub>2</sub> (video S22). Left panel:  $\lambda$ DNA is totally stretched on surface with the immobilized MukB. Right  
 336 panel: laser excitation induces  $\lambda$ DNA break, and DNA debris is still at the tether points on the surface.  
 337 One exemplary tether point is marked by red arrow.

338

339

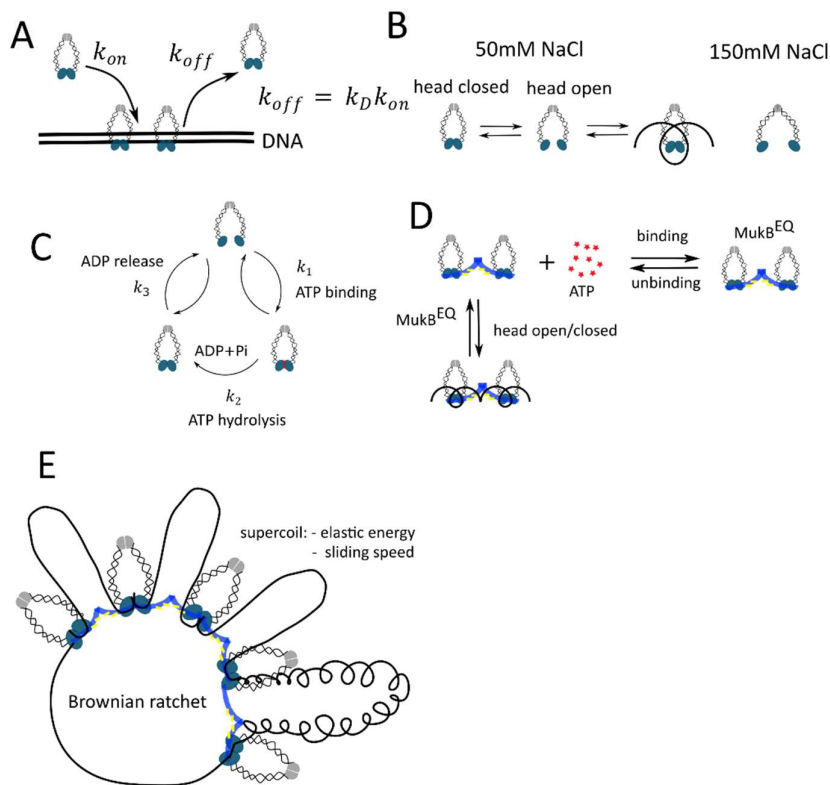

340

341 **Figure 4: Kinetics of MukBEF loading/unloading on/from DNA and Brownian ratchet model.** (A)  
 342 Binding kinetics of MukB and DNA.  $k_{off}$  and  $k_{on}$  represent dissociation (off-rate) and association  
 343 (on-rate) rates of MukB from to/ DNA, respectively.  $K_D$  represents binding affinity between MukB and  
 344 DNA. The balance of on and off rates determines the binding occupation of MukB on the DNA. As off-  
 345 rate  $k_{off}$  is usually assumed to be independent of protein concentration, the MukB concentration has  
 346 to be above a 'threshold' concentration to gradually decorate DNA for inducing the observed DNA  
 347 compaction. (B) Equilibration between closed and open head states at 50mM NaCl. We assume that

348 low salt concentration (50 mM NaCl) artificially increases the stability of the head domain. At this salt  
349 concentration, the MukB head is transiently opening the closed MukB ring due to thermal fluctuations,  
350 which allows DNA to be topologically entrapped in the MukB ring and potentially wrapped around the  
351 head domains. In contrast, under high salt concentration (150 mM NaCl), no stable interaction  
352 between MukB and DNA can be observed. (C) Kinetics of ATP hydrolysis cycle. The mean turn-  
353 over time of ATP hydrolysis measured in a test tube consists of three contributions: ATP binding rate  
354 ( $k_1$ ), single ATP turn-over rate ( $k_2$ ), and ADP releasing rate ( $k_3$ ). We assumed that the 'real' ATP  
355 hydrolysis rate ( $k_2$ ) can be regarded to be constant at physiological concentrations of ATP/ADP. ATP  
356 binding ( $k_1$ ) requires that two head domains are very close to each other, which is the rate-limiting  
357 step of the ATPase cycle. When only MukB is present, the ATPase head domain does freely diffuse and  
358 it takes comparably long time to bind ATP (slow  $k_1$ ), in which case one observes  
359 negligible ATPase activity. MukF promotes contact between MukB heads by restricting their free  
360 diffusion, which increase the ATP binding rate ( $k_1$ ), and therefore leads to increased ATPase activity.  
361 MukEF inhibits MukB head rotation/diffusion for ADP release, therefore, a decrease of  $k_3$  and a  
362 slightly decreased ATPase activity as compared to MukF is observed. Overall, MukF and MukE regulate  
363 ATP binding /ADP releasing, leading to the observed ATP hydrolysis rates in the test tube. (D) Binding  
364 kinetics of MukB<sup>EQEF</sup>, ATP and DNA. MukB<sup>EQEF</sup> without ATP is capable of opening the MukB ring at a  
365 low possibility due to thermal fluctuations, which allows DNA entrapment. As ATP hydrolysis regulates  
366 MukB head opening/closing. Without ATP hydrolysis, MukB<sup>EQEF</sup> cannot be unloaded from DNA,  
367 therefore, MukB<sup>EQEF</sup> is very stably associated on DNA, even under 150 mM NaCl and ~1 pN force. (E)  
368 Brownian ratchet model for DNA sliding through MukBEF. The big loops are formed by dimerization  
369 of MukF. DNA sliding through MukB regulates loop size. Supercoiling of DNA, which is related to the  
370 elastic energy of DNA, may regulate the sliding speed.

## 371 **Materials and Methods**

372

### 373 **Fabrication of flow cell**

374 The glass slides and coverslips were super-cleaned with Acetone, 1M NaCl and MiliQ water  
375 solutions. The bottom coverslip was functionalized with an amino-group in the 2% 3-  
376 aminopropyltriethoxysilane (440140, Sigma) in acetone for 10 min. Then surfaces were  
377 PEGylated by applying a viscous mixture of PEG and biotin-PEG to one side of the coverslip at  
378 room temperature for 3 hours and washed intensively with MiliQ water.

379 Four 1.5 mm holes were drilled in the glass slide in the pattern show in Fig. 1B, and 1.5 mm  
380 diameter tubing was glued into each hole with epoxy resin glue. Afterwards, double-side tape  
381 was stack between coverslip and drilled glass slide to make a flow cell.

382

### 383 **Double-tethered $\lambda$ DNA for single-molecule study**

384 The double biotin-labelled  $\lambda$ DNA preparation was similar as ref.(9). Flow cells were first  
385 incubated with 0.3 mg/mL Neutravidin in T50 buffer (20mM Tris-HCl, pH=7.5, 50 mM NaCl)  
386 for 1 min and washed with 400  $\mu$ l T50 buffer. 50  $\mu$ l of 20 pM double biotin-labelled  $\lambda$ DNA  
387 (ThermoFisher Scientific; SD0011) was introduced into flow cells at 1 ~ 2  $\mu$ l/min in the T50  
388 buffer with 200 nM Sytox orange (ThermoFisher Scientific; S11368). Excess DNA was washed  
389 off with T50 buffer once optimum DNA density was achieved.

390 10-100 nM MukB-Cy5 in the crude image buffer without PCA/PCD and Trolox (20mM Tris-HCl,  
391 pH=7.5, 50 mM NaCl, 0.3mg/BSA, 2 mM DTT, 400 nM Sytox orange ) was introduced at 1  
392  $\mu$ l/min, to observe DNA compaction. 10 nM MukF, 20 nM MukE and 1 mM ATP-Mg<sup>2+</sup> in the  
393 imaging buffer (20 mM Tris-HCl, pH=7.5, 50 mM NaCl, 0.3 mg/BSA, 2 mM DTT, 2.5 mM PCA,  
394 50 nM PCD, 1 mM Trolox and 400 nM Sytox orange ) was introduced in the perpendicular  
395 direction.

396 For EQ mutation, 10 nM MukB<sup>EQ</sup>-Cy5, 10 nM MukF, 20nM MukE and 1 mM ATP-Mg<sup>2+</sup> in the  
397 imaging buffer (20 mM Tris-HCl, pH=7.5, 50 mM NaCl, 0.3 mg/BSA, 2 mM DTT, 2.5 mM PCA,  
398 50 nM PCD, 1 mM Trolox and 400 nM Sytox orange ) was introduced into the flow cell, and  
399 then 10 nM MukF, 20 nM MukE and 1 mM ATP-Mg<sup>2+</sup> in the imaging buffer (20 mM Tris-HCl,  
400 pH=7.5, 50 mM NaCl, 0.3 mg/BSA, 2 mM DTT, 2.5 mM PCA, 50 nM PCD, 1 mM Trolox and 400  
401 nM Sytox orange ) was introduced in the perpendicular direction.

402 For DA mutation, 100 nM MukB<sup>DA</sup> was introduced in the flow cell.

#### 403 **Immobilization of His<sub>6</sub>-tagged MukB for single-molecule study**

404 Flow cell was first incubated with 0.3 mg/mL Neutravidin in T50 buffer (20 mM Tris-HCl,  
405 pH=7.5, 50 mM NaCl) for 1 min and washed with 400  $\mu$ l T50 buffer. Afterwards, 2 g/ml  
406 Biotinylated Anti-His Antibody (Penta-His Biotin Conjugate; Qiagen; No. 34440) in T50 buffer  
407 was introduced into flow cells at 50  $\mu$ l/min, then wash immediately with 300ul T50 buffer. 5  
408 nM - 10nM MukB was incubated with 100 pM  $\lambda$ DNA or 100 pM 44kb plasmid in T50 buffer for  
409 20 min at room temperature (22 °C), then introduced into the flow cell at 5-10  $\mu$ l/min to  
410 immobilize His6-tagged MukB on the surface.

411

#### 412 **Single-molecule Imaging**

413 Single-molecule TIRF experiments were performed on a custom-built, objective-type TIRF  
414 microscope. A green laser (532-nm Cobolt Samba; Cobalt) and a red laser (635-nm CUBE;  
415 Coherent) were combined using a dichroic mirror and coupled into a fibre optic cable. The  
416 output of the fibre was focused into the back focal plane of the objective (magnification of  
417 100 $\times$ , oil immersion, N.A. = 1.4, f/26.5; UPlanSApo, Olympus) and displaced perpendicular to  
418 the optical axis such that laser light was incident at the slide/solution interface at greater than  
419 the critical angle, creating an evanescent excitation field. Illumination powers were set as low  
420 as possible to avoid the photo damage of DNA.

421 Fluorescence emission was collected by the objective and separated from the excitation light  
422 by a dichroic mirror (545 nm/650 nm; Semrock) and clean-up filters (545-nm long pass,  
423 Chroma; 633/25-nm notch filter, Semrock). The emission signal was focused on a rectangular  
424 slit to crop the image and then spectrally separated, using a dichroic mirror (630-nm long pass;  
425 Omega), into two emission channels that were focused side-by-side onto an electron  
426 multiplying charge coupled device (EMCCD) camera (iXon 897; Andor). The EMCCD was set to  
427 an EM gain of 300, corresponding to an approximate real gain of four counts per photon. Each  
428 pixel on the EMCCD corresponded to a 96  $\times$  96-nm region in the imaging plane.

429

#### 430 **Image analysis and data processing**



431 Fluorescence images were analyzed by ImageJ software.

432

### 433 **Expression and purification of the MukBEF His<sub>6</sub>-tagged proteins**

434 Wild-type MukB was 6×His-tagged at the C-terminus and was expressed from plasmid Pet21  
435 in C3013I cells (NEB). For Immobilized His<sub>6</sub>-tagged MukB, a 10 amino acids flexible glycine-  
436 serine protein domain linker (or Halo Tag) was introduced between His tag and MukB. 2L  
437 cultures were grown in LB with appropriate antibiotics at 37 °C to OD<sub>600</sub>~0.6 and induced by  
438 adding IPTG at final concentration of 0.4 mM. After 4 hours at 30 °C, cells were harvested by  
439 centrifugation, suspended in 30ml lysis buffer (50 mM HEPES pH 7.5, 300 mM NaCl, 5%  
440 glycerol, 10 mM imidazole) supplemented with 1 tablet Complete mini-protease inhibitor  
441 cocktail (Roche) and sonicated. Cell debris was removed by centrifugation and target proteins  
442 were first purified by TALON Superflow resin. Then, the fractions from TALON were diluted to  
443 100mM NaCl buffer and injected to HiTrap™ Heparin HP column (GE Healthcare) pre-  
444 equilibrated with Buffer A (50mM HEPES pH 7.5, 100mM NaCl, 5% glycerol, 1 mM EDTA, 1  
445 mM DTT), then the column was washed at 1ml/min flow rate with a gradient 100-1000 mM  
446 NaCl. The eluted fractions were collected and dialyzed with dialysis buffer (25 mM HEPES pH  
447 7.5, 25 mM KCl, 0.1 mM EDTA, 2 mM DTT, 1 mM PMSF, 5% Glycerol).

448 The 6×His-tagged MukE and MuF were also at the C-terminus. For MukE-6×His and  
449 MukF6×His purifications, fractions from TALON resin were diluted and injected into HiTrap  
450 DEAE FF column (GE healthcare) pre-equilibrated in Buffer A, and then the column was washed  
451 at 1 ml/min flow rate with a gradient 100-1000 mM NaCl. The eluted fractions were collected  
452 and dialyzed with dialysis buffer. Protein concentration was estimated by UV absorption at  
453 280 nm on Nanodrop and purity was confirmed by SDS-PAGE. Purified proteins were  
454 aliquoted, snap-frozen and stored at -80 °C until use.

455

### 456 **Expression, purification and fluorescent labeling of the MukB His<sub>6</sub>-tagged protein**

457 To label MukB site-specifically, the unnatural amino acid *p*-azido-L-phenylalanine (AZP) was  
458 incorporated into the MukB (52). The plasmid pBAD-MukB-S718TAG-10GS-6×His was  
459 constructed as following: First, MukB gene was inserted into pBAD vector. MukB was 6×His-  
460 tagged at the C-terminus, and 10 aa flexible glycine-serine protein domain linker was  
461 introduced between His tag and MukB. Then an amber (TAG) codon was introduced at 718  
462 position of hinge domain of MukB by site- Mutagenesis.

463 To express MukB incorporated with AZP, pBAD-MukB-S718TAG-10GS-6×His plasmid and a  
464 pEvol plasmid containing the engineered Amber suppressor tRNA/synthetase system carrying  
465 a chloramphenicol resistance marker, were transformed into a derived strain (FW01 )from  
466 C321ΔA strain, with chromosomal MukB tagged with 3XFlag.

467 2L cultures were grown in LB with 100 µg/ml Carbanicillin, 25µg/ml chloramphenicol and 1%  
468 glucose at 30 °C to OD<sub>600</sub>~0.6 with 1mM *p*-azido-L-phenylalanine, and then induced by  
469 adding of L-arabinose at final concentration of 0.4% (W/V). After 4 hours at 30 °C, cells were  
470 harvested by centrifugation, suspended in 30ml lysis buffer (50mM HEPES pH 7.5, 300mM  
471 NaCl, 5% glycerol, 10mM imidazole) supplemented with 1 tablet Complete mini-protease  
472 inhibitor cocktail (Roche) and sonicated. Cell debris was removed by centrifugation and target



473 proteins were first purified by TALON Superflow resin. Then, the fractions from TALON were  
474 diluted to 100mM NaCl buffer and injected to HiTrap™ Heparin HP column (GE Healthcare)  
475 pre-equilibrated with Buffer A (50 mM HEPES pH 7.5, 100mM NaCl, 5% glycerol, 1mM EDTA,  
476 1 mM DTT), then the column was washed at 1ml/min flow rate with a gradient 100-1000mM  
477 NaCl. The eluted fractions. The chromosomal MukB was removed by adding ANTI-FLAG® M2  
478 Affinity gel (A2220, Sigma) into the eluted fractions. After incubation for 30 min at 4 °C, and  
479 the gel was discarded by centrifugation. The supernatant was collected and concentrated by  
480 ultrafiltration.

481 The purified protein was labelled via copper free click chemistry. The protein was incubated  
482 with ~20× molar excess of Dibenzylcyclooctyne(DBCO)-Sulfo-Cy5 (Jena Bioscience) at 4°C  
483 overnight in the dark. The Cy5 labelled MukB was purified by size-exclusion chromatography  
484 on a Superdex 200 10/300 GL column (GE Healthcare). Peak fractions were pooled and  
485 concentrated by ultrafiltration.

486 Labeling efficiency was estimated to be 65% based on the absorbance ratio of 280 and 650  
487 nm, using the calculated molar extinction coefficient of MukB at 280 nm (335,670 M<sup>-1</sup> cm<sup>-1</sup>),  
488 the molar extinction coefficient of the Cy5 dye at 650 nm (250,000 cm<sup>-1</sup>M<sup>-1</sup>), and correct  
489 factor for the absorption at 280 nm by the dye ( $\epsilon_{280 \text{ nm}}/\epsilon_{650 \text{ nm}} = 0.05$ ).

490

#### 491 **Expression and purification of the MukE-Flag and MukF-Flag proteins**

492 MukF Flag-tagged fragments were expressed from pET 21 plasmids in C3013I cells (NEB).The  
493 Flag-tagged MukE and MuF were at the C-terminus. pET21-MukE-C100S-Cys-Flag and pET21-  
494 MukF-C204S-Cys-Flag were constructed with the indigenous cysteines were removed and one  
495 cysteine was introduced at the C-terminus.

496 2L cultures were grown in LB with appropriate antibiotics at 37 °C to OD<sub>600</sub>~0.6 and induced  
497 by adding IPTG at final concentration of 1mM. After 4 hours at 30 °C, cells were harvested by  
498 centrifugation, suspended in lysis and binding buffer (50mM HEPES pH 7.5, 150mM NaCl, 10%  
499 glycerol, 1mM EDTA) supplemented with 1 tablet Complete mini-protease inhibitor cocktail  
500 (Roche) and sonicated. Cell debris was removed by centrifugation and target proteins were  
501 incubated with 2ml ANTI-FLAG® M2 Affinity gel (A2220, Sigma) at 4°C for 4 hours. The Flag  
502 tagged proteins were eluted out with high salt buffer (50mM HEPES pH 7.5, 500mM NaCl, 10%  
503 glycerol, 1mM EDTA). The eluted fractions were collected and dialyzed with dialysis buffer.  
504 Purified protein was snap-frozen and stored at -80°C until use.

#### 505 **ATP Hydrolysis Assays**

506 ATP hydrolysis was analysed in steady state reactions using an ENZCheck Phosphate Assay Kit  
507 (Life Technologies). 150 µL samples containing standard reaction buffer supplemented with  
508 2 mM of ATP were assayed in a 18 BMG Labtech PherAstar FS plate reader at room  
509 temperature. The results were computed using MARS data analysis software. Quantitation of  
510 phosphate release was determined using the extinction coefficient of 11,200 M<sup>-1</sup>cm<sup>-1</sup> for the  
511 phosphate-dependent reaction at 360 nm at pH 7.0.

#### 512 **Mutagenesis**

513 Point mutations in all constructs were made by using Q5 Site-Directed Mutagenesis Kit (NEB).  
514 Primers were designed with NEBase Changer. 10 ng of the template was taken to the reaction.  
515 Plasmids were isolated and mutations confirmed by sequencing.

#### 516 **Complementation assay**

517 The assay relied on the ability of MukB expressed from pET21 in the absence of IPTG (leaky  
518 expression) to complement growth defect of  $\Delta$ mukB (RRL149) cells at non-permissive  
519 temperature (37°C). Cells were transformed with pET21 carrying mukB or mukB variant and  
520 allowed to recover over night post transformation at permissive temperature (22°C) on LB  
521 plates containing Carbenicillin (100µg/ml) along with positive and negative controls. Then  
522 single colonies were streaked onto two fresh plates and incubated at the permissive or non-  
523 permissive temperature to assay their ability to complement the growth deficiency.

524

525

#### 526 **COMPETING INTERESTS**

527 The other authors declare that no competing interests exist.

#### 528 **AUTHOR CONTRIBUTIONS**

529 M.Z and D.J.S conceived and directed the project. M.Z. undertook biochemical experiments,  
530 single molecule experiments and undertook quantitative imaging and analysis. M. Z. wrote  
531 the manuscript.

#### 532 **ACKNOWLEDGEMENT**

533 We thank Florence Wagner for plasmid preparation and EMSA assays. Gemma L. M. Fisher  
534 undertook the ATPase assay. Achillefs Kapanidis (Dept of Physics, University of Oxford)  
535 provided facilities for single molecule experiments and David Sherratt provided facilities for  
536 biochemical experiments in the Department of Biochemistry and directed some of the  
537 research. Members of Kapanidis group provided support for single molecule experiments.  
538 James Ross (University of Leeds) helped with crystal structure modelling. We thank David  
539 Sherratt and all members of the Sherratt lab for helpful discussions. We thank Achillefs  
540 Kapanidis and Jörg Enderlein (III. Institute of Physics of the Georg August University  
541 Göttingen) for insightful discussion and constructive criticism of the manuscript.

#### 542 **FUNDING**

543 This work was supported by a Wellcome Investigator Award [200782/Z/16/Z to D.J.S.;  
544 104633/Z/14/Z].

#### 545 **CONFLICT OF INTEREST**

546 None declared.

547

548

549

550

551 **Supplementary figures:**

552

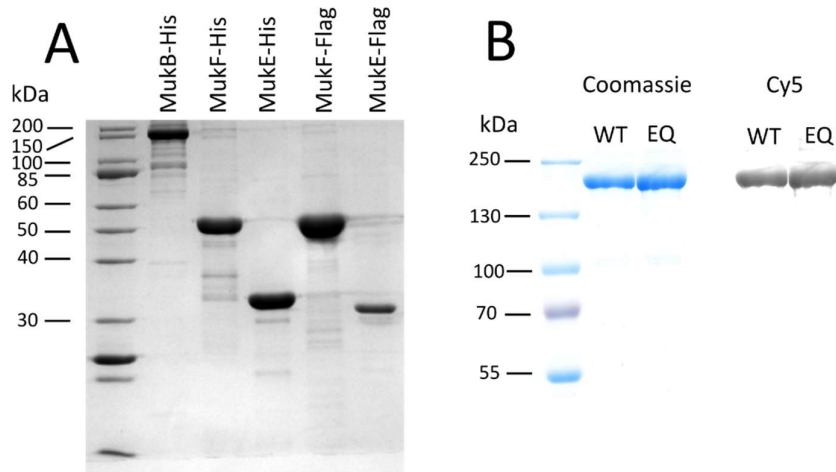

553

554 **Fig S1.** (A) Coomassie blue staining of purified recombinant E.coli MukBEF with His-tag, MukE-Flag  
 555 and MukF-Flag. (B) The purified and labeled Wild-type MukB (WT) and ATP hydrolysis-defective  
 556 mutant MukB<sup>EQ</sup> (EQ) were analyzed by SDS-PAGE followed by Coomassie blue staining and in gel  
 557 fluorescence detection of Cy5 dye. The labeling efficiency of homodimeric MukB is ~ 65%: a mixture  
 558 of 35% unlabelled, 48.2% singly labelled, and 16.8% doubly labelled MukB is expected.

559

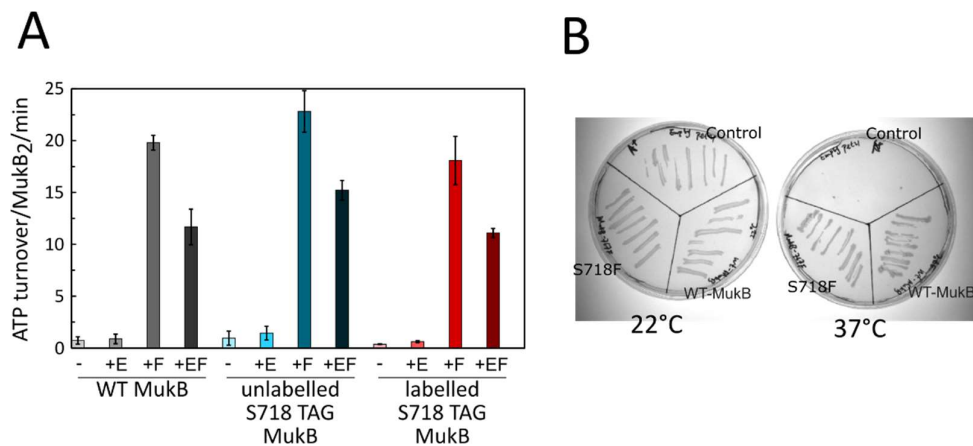

560

561

562 **Fig S2.** (A) The ATPase activities (Mean  $\pm$  SEM) of MukB, S718TAG MukB, and Cy5(Cy3) labelled MukB,  
 563 in the presence of the indicated components. (B) Functional analysis by complementation assay of  
 564 mutated MukB<sub>S718S</sub>. In vivo complementation in cells lacking chromosomal MukB gene  
 565  $\Delta$ mukB (RRL149) by variants expressed from pET21 plasmid. Growth of material streaked of  
 566 MukB<sub>S718F</sub> was compared to growth of cells carrying WT-MukB construct at permissive, 22°C, and  
 567 non-permissive, 37°C; Control: empty vector, a negative control. The MukB<sub>S718F</sub> fully complements  
 568 the temperature-sensitive growth defect of  $\Delta$ mukB cells *in vivo*.

569

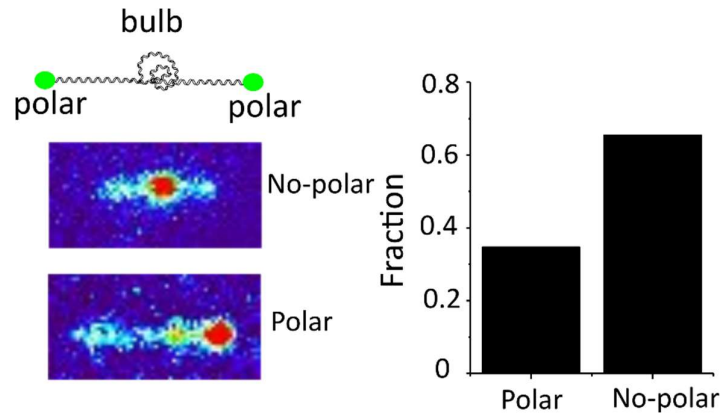

570

571 **Fig S3. Fraction of DNA 'bulb' location.** DNA 'bulbs' are located only by 34.6 % (83/240 DNA  
572 bulbs) at the polar regions of tethered  $\lambda$ DNA which indicates that 'DNA bulb' formation is not  
573 due to protein interaction between MukB and biotin/neutravidin on the surface.

574

575

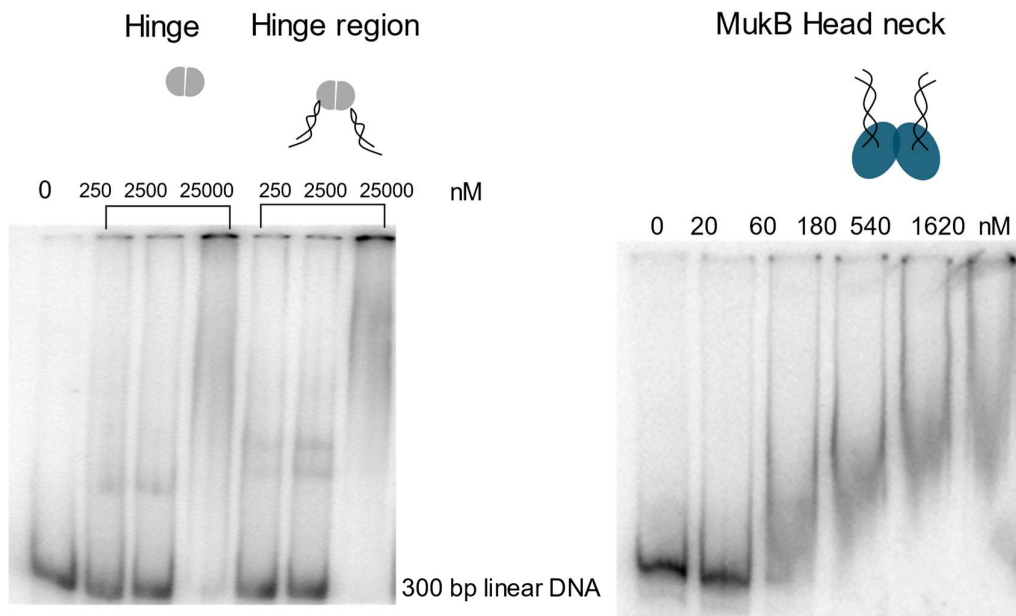

576

577

578 **Fig. S4. Gels from DNA electrophoretic mobility shift assay (EMSA) to test binding affinities**  
579 **of MukB fragments to DNA *in vitro*.** The DNA fragment concentration was 300 nM. Hinge of MukB  
580 and Hinge range of MukB concentrations were: 250, 2500 and 25000 nM, respectively. MukB head  
581 neck concentration were: 20, 60, 180, 540, 1620 nM. Samples were incubated for 30 min at room  
582 temperature in T50 buffer, and applied to a 6 % polyacrylamide gel equilibrated with the same buffer.  
583 Electrophoresis was at 120 V for 1 h. Concentration "0" denotes free DNA. Very weak binding between  
584 DNA and MukB fragments can be observed.

585

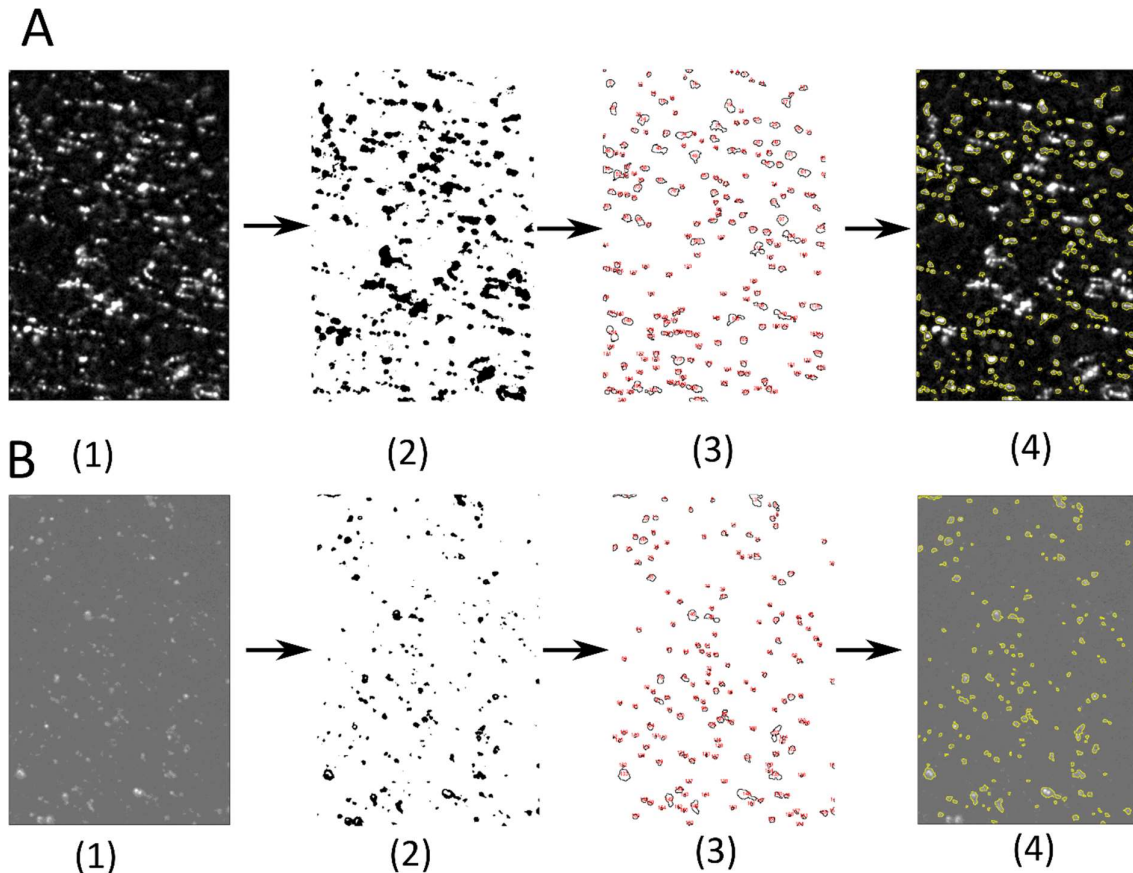

586

587

588 **Fig S5. Example of imaging process to quantify intensity of MukB<sup>EQ</sup> clusters with MukE and**  
589 **MukF (A) or MonoMukF (B) on the tethered DNA. (1) the image after subtracting background**  
590 **(2) A binary mask after applying thresholding to select the MukB<sup>EQ</sup> molecules (3) identified ranges by**  
591 **applying 'analyze particles' on the mask, that are between 9-300 pixels and with a circularity of**  
592 **between 0.2 and 1. (4) overlapped structures with the original image. The intensity of selected ranges**  
593 **was calculated for number determination of MukB<sup>EQ</sup>.**

594



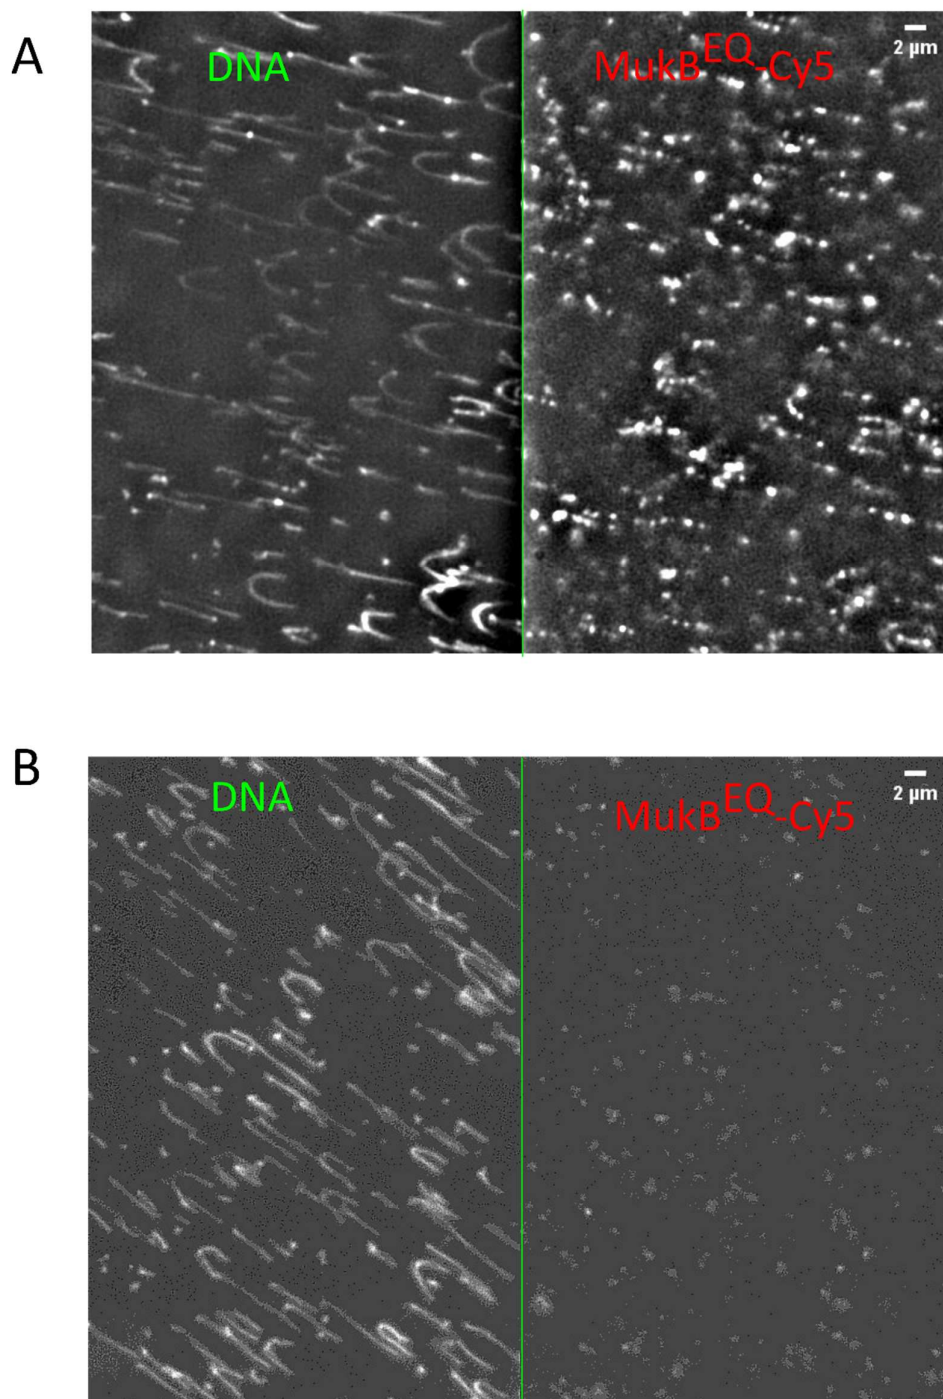

595

596 **Fig. S6 (A).** Snap-shot of MukB<sup>EQ</sup> EF clusters with ATP-Mg<sup>2+</sup> in 150mM NaCl under 1 pN force.  
597 **(B).** Snap-shot of MukB<sup>EQ</sup> with MukE, MonoMukF and ATP-Mg<sup>2+</sup> in 150mM NaCl on the



598 biotinylated anti-His<sub>6</sub>-antibody functionalized PEG surface. Left channel is Sytox Orange  
599 stained DNA, and the right channel is Cy5 labelled MukB<sup>EQ</sup>.

600

601

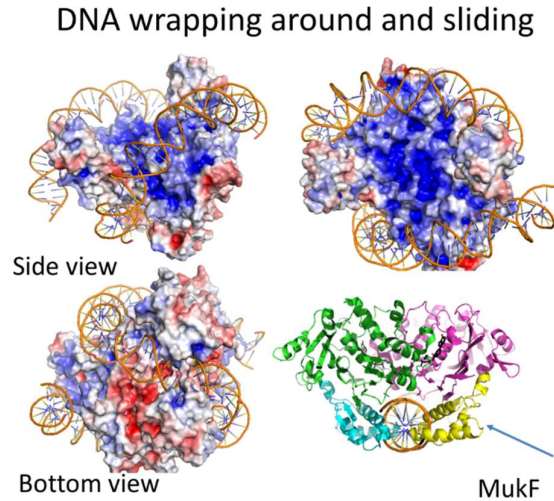

602

603 **Fig. S7 DNA wrapping around the head domain of MukB and sliding.** Proposed model based on  
604 published crystal structure (Woo et al., 2009): DNA is topologically entrapped by a MukB head in the  
605 presence of the MukF C terminus. C terminus of MukF inserts into the groove of DNA (also see video  
606 14). Structural studies of wide-type SMC complex would help verify the DNA binding sites. This DNA  
607 sliding model can also explain the different behaviours of other SMC-similar proteins. For example,  
608 Mre11-nuclease & Rad50-ATPase complex show different properties when interacting with linear or  
609 with circular DNA (not supercoiled), while linear DNA is more probable to slide into the Rad50 ring to  
610 allow digestion by Mre11-nuclease (53). Also, cohesion complexes act differently in the presence of  
611 linear and circular DNA (not supercoiled) attached to beads under high salt concentration, where a  
612 cohesion complex can slide off the free ends of linear DNA, but gets trapped on circular DNA (54).

613

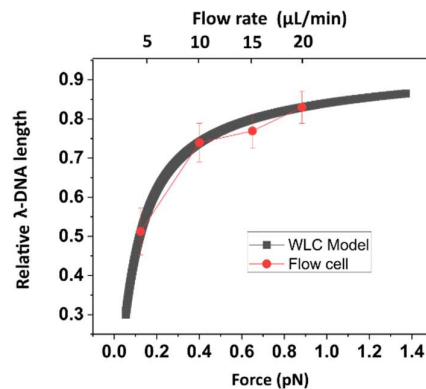

614

615 **Fig. S8 Calibration of applied force and flowrate.** The flowrate is between 1ul/min to 100ul/min. The  
616 applied force is calibrated based on the previous studies (55).The relationship between applied flow  
617 rate and relative λDNA length, fitted to the Worm-Like Chain (WLC) model (solid line) with the fitted  
618 persistence length of 43 nm and a contour length of 16.3 μm.

619 **Reference**

- 620 1. K. Nasmyth, C. H. Haering, The structure and function of SMC and kleisin complexes.  
621 *Annu. Rev. Biochem.* **74**, 595–648 (2005).
- 622 2. A. J. Wood, A. F. Severson, B. J. Meyer, Condensin and cohesin complexity: the  
623 expanding repertoire of functions. *Nat. Rev. Genet.* **11**, 391–404 (2010).
- 624 3. S. Gruber, MukBEF on the march: taking over chromosome organization in bacteria?  
625 *Mol. Microbiol.* **81**, 855–859 (2011).
- 626 4. S. Nolivos, D. Sherratt, The bacterial chromosome: architecture and action of bacterial  
627 SMC and SMC-like complexes. *FEMS Microbiol. Rev.* **38**, 380–392 (2014).
- 628 5. T. Terakawa, S. Bisht, J. M. Eeftens, C. Dekker, C. H. Haering, E. C. Greene, The condensin  
629 complex is a mechanochemical motor that translocates along DNA. *Science (80-. )*. **358**,  
630 672–676 (2017).
- 631 6. M. Kanke, E. Tahara, P. J. Huis in't Veld, T. Nishiyama, Cohesin acetylation and Wapl-  
632 Pds5 oppositely regulate translocation of cohesin along DNA. *EMBO J.* **35**, 2686–2698  
633 (2016).
- 634 7. J. Stigler, G. Çamdere, D. E. Koshland, E. C. Greene, Single-molecule imaging reveals a  
635 collapsed conformational state for DNA-bound cohesin. *Cell Rep.* **15**, 988–998 (2016).
- 636 8. I. F. Davidson, D. Goetz, M. P. Zaczek, M. I. Molodtsov, P. J. Huis in 't Veld, F. Weissmann,  
637 G. Litos, D. A. Cisneros, M. Ocampo-Hafalla, R. Ladurner, F. Uhlmann, A. Vaziri, J. Peters,  
638 Rapid movement and transcriptional re-localization of human cohesin on DNA. *EMBO*  
639 *J.* **35**, 2671–2685 (2016).
- 640 9. M. Ganji, I. A. Shaltiel, S. Bisht, E. Kim, A. Kalichava, C. H. Haering, C. Dekker, Real-time  
641 imaging of DNA loop extrusion by condensin. *Science (80-. )*. **360**, 102–105 (2018).
- 642 10. I. F. Davidson, B. Bauer, D. Goetz, W. Tang, G. Wutz, J.-M. Peters, DNA loop extrusion  
643 by human cohesin. *Science (80-. )*. **366**, 1338–1345 (2019).
- 644 11. Y. Kim, Z. Shi, H. Zhan, I. J. Finkelstein, H. Yu, Human cohesin compacts DNA by loop  
645 extrusion. *Science (80-. )*. **366**, 1345–1349 (2019).
- 646 12. E. Kim, J. Kerssemakers, I. A. Shaltiel, C. H. Haering, C. Dekker, DNA-loop extruding  
647 condensin complexes can traverse one another. *Nature.* **579**, 438–442 (2020).
- 648 13. J. Pelletier, K. Halvorsen, B. Ha, R. Paparcone, S. J. Sandler, C. L. Woldringh, W. P. Wong,  
649 S. Jun, Physical manipulation of the Escherichia coli chromosome reveals its soft nature.  
650 *Proc. Natl. Acad. Sci.* **109**, E2649–E2656 (2012).
- 651 14. C. Jeon, Y. Jung, B. Ha, A ring-polymer model shows how macromolecular crowding  
652 controls chromosome-arm organization in Escherichia coli. *Sci. Rep.* **7**, 1–10 (2017).
- 653 15. D. Marenduzzo, C. Micheletti, P. R. Cook, Entropy-Driven Genome Organization.  
654 *Biophys. J.* **90**, 3712–3721 (2006).
- 655 16. S. Jun, B. Mulder, Entropy-driven spatial organization of highly confined polymers :  
656 Lessons for the bacterial chromosome. *Proc. Natl. Acad. Sci.* **103**, 12388–12393 (2006).

- 657 17. S. Jun, A. Wright, Entropy as the driver of chromosome segregation. *Nat. Rev. Microbiol.*  
658 **8**, 600–607 (2010).
- 659 18. I. F. Lau, S. R. Filipe, B. Søballe, O. A. Økstad, F. X. Barre, D. J. Sherratt, Spatial and  
660 temporal organization of replicating Escherichia coli chromosomes. *Mol. Microbiol.* **49**,  
661 731–743 (2003).
- 662 19. J. K. Fisher, A. Bourniquel, G. Witz, B. Weiner, M. Prentiss, N. Kleckner, Four-  
663 dimensional imaging of E. coli nucleoid organization and dynamics in living cells. *Cell.*  
664 **153**, 882–895 (2013).
- 665 20. C. A. Brackley, J. Johnson, D. Michieletto, A. N. Morozov, M. Nicodemi, P. R. Cook, D.  
666 Marenduzzo, Nonequilibrium chromosome looping via molecular slip links. *Phys. Rev.*  
667 *Lett.* **119**, 1–5 (2017).
- 668 21. T. R. Strick, T. Kawaguchi, T. Hirano, Real-time detection of single-molecule DNA  
669 compaction by condensin I. *Curr. Biol.* **14**, 874–880 (2004).
- 670 22. J. E. Moody, L. Millen, D. Binns, J. F. Hunt, P. J. Thomas, Cooperative, ATP-dependent  
671 association of the nucleotide binding cassettes during the catalytic cycle of ATP-binding  
672 cassette transporters. *J. Biol. Chem.* **277**, 21111–21114 (2002).
- 673 23. M. Hirano, T. Hirano, Positive and negative regulation of SMC-DNA interactions by ATP  
674 and accessory proteins. *EMBO J.* **23**, 2664–2673 (2004).
- 675 24. R. Vazquez Nunez, L. B. Ruiz Avila, S. Gruber, Transient DNA occupancy of the SMC  
676 interarm space in prokaryotic condensin. *Mol. Cell.* **75**, 209–223 (2019).
- 677 25. M. A. Schwartz, L. Shapiro, An SMC ATPase mutant disrupts chromosome segregation  
678 in Caulobacter. *Mol. Microbiol.* **82**, 1359–1374 (2011).
- 679 26. A. Badrinarayanan, R. Reyes-Lamothe, S. Uphoff, M. C. Leake, D. J. Sherratt, In vivo  
680 architecture and action of bacterial structural maintenance of chromosome proteins.  
681 *Science (80-. )*. **338**, 528–531 (2012).
- 682 27. B. Hu, T. Itoh, A. Mishra, Y. Katoh, K. L. Chan, W. Upcher, C. Godlee, M. B. Roig, K.  
683 Shirahige, K. Nasmyth, ATP hydrolysis is required for relocating cohesin from sites  
684 occupied by its Scc2/4 loading complex. *Curr. Biol.* **21**, 12–24 (2011).
- 685 28. W. She, Q. Wang, E. A. Mordukhova, V. V. Rybenkov, MukEF is required for stable  
686 association of MukB with the chromosome. *J. Bacteriol.* **189**, 7062–7068 (2007).
- 687 29. K. V. Rajasekar, R. Baker, G. L. M. Fisher, J. R. Bolla, J. Mäkelä, M. Tang, K. Zawadzka, O.  
688 Koczy, F. Wagner, C. V. Robinson, L. K. Arciszewska, D. J. Sherratt, Dynamic architecture  
689 of the Escherichia coli structural maintenance of chromosomes (SMC) complex,  
690 MukBEF. *Nucleic Acids Res.* **47**, 9696–9707 (2019).
- 691 30. S. Morbach, S. Tebbe, E. Schneider, The ATP-binding Cassette ( ABC ) Transporter for  
692 Maltose/Maltodextrins of Salmonella typhimurium. *J. Biol. Chem.* **268**, 18617–18621  
693 (1993).
- 694 31. S. Bahng, R. Hayama, K. J. Mariani, MukB-mediated catenation of DNA is ATP and  
695 MukEF independent. *J. Biol. Chem.* **291**, 23999–24008 (2016).

- 696 32. Y. Cui, Z. M. Petrushenko, V. V. Rybenkov, MukB acts as a macromolecular clamp in  
697 DNA condensation. *Nat. Struct. Mol. Biol.* **15**, 411–418 (2008).
- 698 33. Z. M. Petrushenko, C. H. Lai, R. Rai, V. V. Rybenkov, DNA reshaping by MukB: right-  
699 handed knotting, left-handed supercoiling. *J. Biol. Chem.* **281**, 4606–4615 (2006).
- 700 34. J. S. Woo, J. H. Lim, H. C. Shin, M. K. Suh, B. Ku, K. H. Lee, K. Joo, H. Robinson, J. Lee, S.  
701 Y. Park, N. C. Ha, B. H. Oh, Structural studies of a bacterial condensin complex reveal  
702 ATP-dependent disruption of intersubunit interactions. *Cell.* **136**, 85–96 (2009).
- 703 35. K. Zawadzka, P. Zawadzki, R. Baker, K. V. Rajasekar, F. Wagner, D. J. Sherratt, L. K.  
704 Arciszewska, MukB ATPases are regulated independently by the N-and C-terminal  
705 domains of MukF kleisin. *Elife.* **7**, e31522 (2018).
- 706 36. K. Ohsumi, M. Yamazoe, S. Hiraga, Different localization of SeqA-bound nascent DNA  
707 clusters and MukF-MukE-MukB complex in Escherichia coli cells. *Mol. Microbiol.* **40**,  
708 835–845 (2001).
- 709 37. J. Mäkelä, D. J. Sherratt, Organization of the Escherichia coli chromosome by a MukBEF  
710 axial core. *Mol. Cell.* **78**, 250–260 (2020).
- 711 38. T. Ariga, M. Tomishige, D. Mizuno, Nonequilibrium energetics of molecular motor  
712 kinesin. *Phys. Rev. Lett.* **121**, 218101 (2018).
- 713 39. W. Hwang, M. Karplus, Structural basis for power stroke vs. Brownian ratchet  
714 mechanisms of motor proteins. *Proc. Natl. Acad. Sci. U. S. A.* **116**, 19777–19785 (2019).
- 715 40. F. Uhlmann, SMC complexes : from DNA to chromosomes. *Nat Rev Mol Cell Biol.* **7**,  
716 399–412 (2016).
- 717 41. Y. Murayama, F. Uhlmann, DNA entry into and exit out of the cohesin ring by an  
718 interlocking gate mechanism. *Cell.* **163**, 1628–1640 (2015).
- 719 42. M. Sun, T. Nishino, J. F. Marko, The SMC1-SMC3 cohesin heterodimer structures DNA  
720 through supercoiling-dependent loop formation. *Nucleic Acids Res.* **41**, 6149–6160  
721 (2013).
- 722 43. R. E. Depew, J. C. Wang, Conformational fluctuations of DNA helix. *Proc. Natl. Acad. Sci.*  
723 **72**, 4275–4279 (1975).
- 724 44. A. V. Vologodskii, A. V. Lukashin, V. V. Anshelevich, M. D. Frank-Kamenetskii,  
725 Fluctuations in superhelical DNA. *Nucleic Acids Res.* **6**, 967–982 (1979).
- 726 45. J. F. Marko, E. D. Siggia, Fluctuations and supercoiling of DNA. *Science (80- ).* **265**, 506–  
727 508 (1994).
- 728 46. J. Langowski, W. K. Olson, S. C. Pedersen, I. Tobias, T. P. Westcott, Y. Yang, DNA  
729 supercoiling, localized bending and thermal fluctuations. *Trends Biochem. Sci.* **21**, 50  
730 (1996).
- 731 47. A. Saha, J. Wittmeyer, B. R. Cairns, Chromatin remodeling by RSC involves ATP-  
732 dependent DNA translocation. *Genes Dev.* **16**, 2120–2134 (2002).

- 733 48. I. Whitehouse, C. Stockdale, A. Flaus, M. D. Szczelkun, T. Owen-Hughes, Evidence for  
734 DNA Translocation by the ISWI Chromatin-Remodeling Enzyme. *Mol. Cell. Biol.* **23**,  
735 1935–1945 (2003).
- 736 49. K. K. Sinha, J. D. Gross, G. J. Narlikar, Distortion of histone octamer core promotes  
737 nucleosome mobilization by a chromatin remodeler. *Science (80-. )*. **355**, eaaa3761  
738 (2017).
- 739 50. Y. Zhang, C. L. Smith, A. Saha, S. W. Grill, S. Mihardja, S. B. Smith, B. R. Cairns, C. L.  
740 Peterson, C. Bustamante, DNA translocation and loop formation mechanism of  
741 chromatin remodeling by SWI/SNF and RSC. *Mol. Cell.* **24**, 559–568 (2006).
- 742 51. G. Lia, E. Praly, H. Ferreira, C. Stockdale, Y. C. Tse-Dinh, D. Dunlap, V. Croquette, D.  
743 Bensimon, T. Owen-Hughes, Direct observation of DNA distortion by the RSC complex.  
744 *Mol. Cell.* **21**, 417–425 (2006).
- 745 52. J. W. Chin, S. W. Santoro, A. B. Martin, D. S. King, L. Wang, P. G. Schultz, Addition of p-  
746 azido-L-phenylalanine to the genetic code of Escherichia coli. *J. Am. Chem. Soc.* **124**,  
747 9026–9027 (2002).
- 748 53. L. Käshammer, J. H. Saathoff, K. Lammens, F. Gut, J. Bartho, A. Alt, B. Kessler, K. P.  
749 Hopfner, Mechanism of DNA end sensing and processing by the Mre11-Rad50 complex.  
750 *Mol. Cell.* **76**, 382–394 (2019).
- 751 54. T. L. Higashi, P. Eickhoff, J. S. Sousa, J. Locke, A. Nans, H. R. Flynn, A. P. Snijders, G.  
752 Papageorgiou, N. O’Reilly, Z. A. Chen, F. J. O’Reilly, J. Rappsilber, A. Costa, F. Uhlmann,  
753 A structure-based mechanism for DNA entry into the cohesin ring. *Mol. Cell.* **79**, 917-  
754 933.e9 (2020).
- 755 55. J. M. Schaub, H. Zhang, M. M. Soniat, I. J. Finkelstein, Assessing protein dynamics on  
756 low-complexity single-stranded DNA curtains. *Langmuir.* **34**, 14882–14890 (2018).
- 757
- 758
